# Supplementary material for: Effect of total population, population density and weighted population density on the spread of Covid-19 in Malaysia
Source: PLoS One. 2023 Apr 27;18(4):e0284157. doi: 10.1371/journal.pone.0284157 (PMC10138265; doi:10.1371/journal.pone.0284157)
Supplement: S1 File — (XLSX) [file pone.0284157.s001.xlsx]

## Sheet: Covid-19 Daily Case
date	perlis	kedah	pulau-pinang	perak	selangor	negeri-sembilan	melaka	johor	pahang	terengganu	kelantan	sabah	sarawak	wp-kuala-lumpur	wp-putrajaya	wp-labuan	Daily cases in Malaysia
2020-03-15	6	26	8	16	52	23	8	30	17	4	15	31	15	106	1	4	316
2020-03-16	0	0	8	5	17	3	3	25	9	3	7	25	8	113	1	4	120
2020-03-17	0	5	7	5	31	0	1	11	1	3	5	21	20	119	1	5	117
2020-03-18	1	4	2	7	31	11	2	13	3	1	14	9	2	123	6	5	109
2020-03-19	0	1	5	10	40	9	2	13	4	9	7	7	7	139	6	5	130
2020-03-20	0	6	13	10	29	5	0	15	1	7	10	17	10	166	9	5	153
2020-03-21	0	5	8	11	17	8	1	16	3	5	2	22	8	183	9	5	123
2020-03-22	0	7	8	15	45	16	2	13	16	6	8	11	2	242	13	5	212
2020-03-23	0	5	2	17	27	15	6	4	0	0	7	1	5	257	15	5	106
2020-03-24	1	5	2	30	54	14	2	34	8	0	6	0	2	270	16	5	172
2020-03-25	0	3	4	23	75	9	0	43	2	1	10	2	10	321	18	5	235
2020-03-26	0	1	6	8	36	6	0	20	4	2	4	10	15	323	20	5	116
2020-03-27	0	1	6	6	33	15	9	26	14	4	10	15	8	344	20	10	173
2020-03-28	0	1	1	11	33	9	1	24	12	2	15	0	11	372	22	10	150
2020-03-29	1	2	1	8	60	10	7	24	3	0	4	4	6	396	24	10	156
2020-03-30	1	0	6	5	32	9	2	16	3	0	4	5	21	430	26	10	140
2020-03-31	0	2	2	5	22	8	11	19	9	1	3	3	32	455	26	10	142
2020-04-01	0	1	2	6	74	18	7	27	3	2	3	1	23	488	34	10	208
2020-04-02	0	1	0	5	63	4	3	21	13	18	0	5	28	543	35	10	217
2020-04-03	0	0	1	2	27	9	2	6	24	6	2	10	7	595	36	11	150
2020-04-04	1	1	2	6	53	11	14	16	7	10	2	13	15	622	37	11	179
2020-04-05	0	3	0	6	27	8	10	30	3	6	1	2	12	640	41	12	131
2020-04-06	4	5	1	14	50	22	4	10	5	0	5	1	15	671	43	13	170
2020-04-07	0	1	6	4	58	9	13	18	3	3	0	7	18	685	45	13	156
2020-04-08	0	2	0	4	40	11	3	7	14	5	1	0	6	699	47	13	109
2020-04-09	0	0	1	1	30	11	14	20	4	3	1	2	15	713	49	13	118
2020-04-10	0	0	5	1	35	17	8	21	27	1	2	10	7	759	51	15	184
2020-04-11	0	0	2	1	53	9	3	14	11	0	1	6	8	803	52	15	153
2020-04-12	0	0	0	3	13	42	0	21	0	4	2	14	6	830	54	15	134
2020-04-13	1	0	3	3	50	2	3	8	11	0	0	5	15	899	54	15	170
2020-04-14	0	1	0	0	17	1	0	14	17	0	0	0	8	926	54	15	85
2020-04-15	0	0	0	1	13	26	0	13	8	2	1	3	16	952	55	15	110
2020-04-16	0	0	0	1	9	13	1	9	1	0	0	5	10	971	55	16	69
2020-04-17	0	0	0	0	2	3	0	16	2	1	0	10	6	985	55	16	54
2020-04-18	0	0	0	0	3	0	37	3	5	0	0	3	5	1004	64	16	84
2020-04-19	0	0	0	0	2	3	2	2	2	0	0	2	6	1008	77	16	36
2020-04-20	0	0	0	0	11	1	1	1	8	0	0	0	22	1021	77	16	57
2020-04-21	0	1	0	0	1	2	1	3	6	0	0	0	19	1037	78	16	50
2020-04-22	0	0	0	0	12	20	0	3	1	1	0	1	4	1066	78	16	71
2020-04-23	0	0	0	0	18	2	3	4	1	0	0	2	9	1115	78	16	88
2020-04-24	0	0	0	0	1	0	0	0	1	0	0	0	10	1154	78	16	51
2020-04-25	0	0	2	0	6	1	1	4	0	0	0	0	7	1170	79	16	38
2020-04-26	0	0	0	1	4	1	0	0	0	0	0	1	3	1200	79	16	40
2020-04-27	0	0	0	0	5	1	0	1	0	0	0	1	8	1214	80	16	31
2020-04-28	0	0	0	0	1	72	0	0	5	0	0	2	6	1222	80	16	94
2020-04-29	0	0	0	0	27	5	5	3	1	0	0	0	5	1232	81	16	57
2020-04-30	0	0	0	0	24	0	1	3	3	0	0	0	2	1264	85	16	69
2020-05-01	0	0	0	0	63	8	2	1	8	0	0	0	9	1278	85	16	105
2020-05-02	0	0	0	0	11	71	3	0	0	0	0	1	5	1308	86	16	122
2020-05-03	0	0	0	0	21	6	3	0	0	0	0	0	0	1333	86	16	55
2020-05-04	0	0	0	0	5	0	0	0	0	0	0	0	2	1356	86	16	30
2020-05-05	0	0	0	0	9	2	1	0	0	0	0	0	11	1378	86	16	45
2020-05-06	0	0	0	0	16	0	1	0	0	0	0	1	1	1398	86	16	39
2020-05-07	0	0	0	0	6	53	0	0	1	0	0	0	1	1404	87	16	68
2020-05-08	0	0	0	0	10	28	1	0	0	0	0	0	4	1414	88	16	54
2020-05-09	0	0	0	2	8	45	0	0	2	0	0	0	1	1423	88	16	67
2020-05-10	0	0	0	0	3	16	1	0	4	0	0	10	0	1458	89	16	70
2020-05-11	0	0	0	0	3	0	0	0	0	0	0	1	0	1470	89	16	16
2020-05-12	0	0	0	0	2	22	2	0	3	0	0	0	1	1475	89	16	35
2020-05-13	0	0	0	0	1	11	1	1	8	0	0	0	0	1493	89	16	40
2020-05-14	0	0	0	0	14	1	1	0	5	0	0	0	0	1508	89	16	36
2020-05-15	0	0	0	0	1	0	0	0	7	0	0	3	0	1515	90	16	19
2020-05-16	0	0	0	0	8	0	0	0	1	0	0	0	0	1528	90	16	22
2020-05-17	0	0	0	0	8	0	0	0	0	0	0	0	0	1566	91	16	47
2020-05-18	0	0	0	0	6	0	0	1	2	0	0	6	0	1588	90	16	36
2020-05-19	0	1	0	0	15	0	0	0	0	1	1	1	0	1598	93	16	32
2020-05-20	0	0	0	0	8	2	0	0	1	0	0	0	0	1637	93	16	50
2020-05-21	0	0	0	0	20	13	1	0	2	0	0	2	1	1676	93	16	78
2020-05-22	0	0	0	0	37	1	0	1	3	0	0	1	0	1681	93	16	48
2020-05-23	0	0	0	0	46	0	0	1	0	0	0	2	0	1692	93	16	60
2020-05-24	0	0	0	0	53	0	0	0	0	0	0	0	4	1807	93	16	172
2020-05-25	0	0	0	0	9	1	0	0	0	0	0	0	0	1984	93	16	187
2020-05-26	0	0	0	0	5	0	0	0	0	0	0	1	3	1990	93	16	15
2020-05-27	0	0	0	0	2	0	0	0	1	0	0	0	0	1997	93	16	10
2020-05-28	0	0	0	0	28	59	0	3	1	0	0	2	0	2007	93	16	103
2020-05-29	0	0	0	1	5	4	2	1	0	0	0	0	0	2020	97	16	30
2020-05-30	0	0	0	0	31	2	1	0	15	0	0	0	0	2028	97	16	57
2020-05-31	0	0	0	0	11	2	13	0	0	0	0	1	0	2039	97	16	38
2020-06-01	0	0	0	0	6	6	1	1	0	0	0	1	0	2044	97	16	20
2020-06-02	0	0	0	0	2	36	0	0	0	0	0	0	0	2099	97	16	93
2020-06-03	0	0	0	0	2	3	0	0	1	0	0	0	0	2370	97	16	277
2020-06-04	0	0	0	0	9	0	1	0	1	0	0	3	1	2374	97	16	19
2020-06-05	0	0	0	0	14	5	0	0	0	0	0	0	2	2389	97	17	37
2020-06-06	0	0	0	0	12	1	0	0	0	0	0	2	0	2393	97	17	19
2020-06-07	0	0	0	0	3	0	1	0	0	0	0	2	0	2394	97	17	7
2020-06-08	0	0	0	0	3	0	0	0	0	0	0	0	0	2398	97	17	7
2020-06-09	0	0	0	0	0	0	0	1	0	0	0	0	1	2398	97	17	2
2020-06-10	0	0	0	0	3	16	11	0	0	0	0	0	0	2399	97	17	31
2020-06-11	0	0	0	0	13	4	4	1	0	0	0	1	0	2409	97	17	33
2020-06-12	0	0	0	1	7	26	2	2	2	0	0	2	0	2410	97	17	43
2020-06-13	0	0	0	0	2	0	1	0	0	0	0	0	1	2414	97	17	8
2020-06-14	0	0	0	0	2	32	2	3	0	0	0	1	0	2415	97	17	41
2020-06-15	0	0	0	0	1	4	0	1	0	0	0	0	3	2417	97	17	11
2020-06-16	0	0	0	0	5	1	0	0	0	0	0	2	1	2418	97	17	10
2020-06-17	0	0	0	1	2	0	0	2	0	0	0	1	4	2422	97	17	14
2020-06-18	0	0	0	0	3	1	0	0	0	0	0	0	1	2423	97	17	6
2020-06-19	0	0	0	0	12	1	0	0	0	0	0	1	0	2430	97	17	21
2020-06-20	0	0	0	0	4	6	1	1	0	0	0	1	3	2430	97	17	16
2020-06-21	0	0	0	0	2	12	0	1	0	0	0	0	0	2430	97	17	15
2020-06-22	0	0	0	0	0	1	0	0	0	0	0	2	0	2430	97	17	3
2020-06-23	0	0	0	0	5	0	0	0	0	0	0	0	1	2430	97	17	6
2020-06-24	0	0	0	0	2	0	0	1	0	0	1	0	0	2430	97	17	4
2020-06-25	0	1	0	0	2	0	0	2	0	0	0	0	0	2431	97	17	6
2020-06-26	0	0	0	0	3	1	0	0	0	0	0	2	0	2435	97	17	10
2020-06-27	0	0	0	0	5	0	0	0	0	0	0	2	1	2436	97	17	9
2020-06-28	0	0	0	0	2	0	0	0	0	0	0	1	0	2436	97	17	3
2020-06-29	0	0	0	0	1	0	0	0	0	0	0	1	0	2436	97	17	2
2020-06-30	0	0	0	0	1	0	0	0	0	0	0	0	0	2436	97	17	1
2020-07-01	0	0	0	0	0	0	0	1	0	0	0	1	0	2437	97	17	3
2020-07-02	0	0	0	0	3	0	0	0	0	0	0	2	0	2437	97	17	5
2020-07-03	0	0	0	0	7	10	0	0	0	0	0	1	0	2438	97	17	19
2020-07-04	0	0	0	0	2	1	0	0	0	0	0	2	0	2438	97	17	5
2020-07-05	0	0	0	0	2	0	0	1	0	0	0	0	1	2439	97	17	5
2020-07-06	0	0	0	0	3	0	0	1	0	0	0	0	0	2441	97	17	6
2020-07-07	0	0	0	0	1	0	0	0	0	0	0	0	1	2442	97	17	3
2020-07-08	0	1	0	0	4	0	0	2	0	0	0	0	2	2445	97	17	12
2020-07-09	0	0	0	0	6	0	0	1	0	0	0	1	0	2445	97	17	8
2020-07-10	0	0	0	0	3	0	1	2	0	0	0	0	2	2445	98	17	9
2020-07-11	0	0	0	0	9	0	0	0	0	0	0	1	2	2445	98	17	12
2020-07-12	0	1	0	0	4	0	1	0	0	0	0	0	1	2445	98	17	7
2020-07-13	0	0	0	0	1	0	0	2	0	0	0	0	0	2446	98	17	4
2020-07-14	0	0	0	0	1	0	0	0	0	0	0	0	3	2447	98	17	5
2020-07-15	0	0	0	0	0	0	0	0	0	1	0	0	1	2448	98	17	3
2020-07-16	0	0	0	0	4	0	0	0	0	2	0	1	10	2448	98	17	17
2020-07-17	0	0	0	0	1	0	0	0	0	0	1	0	7	2448	98	17	9
2020-07-18	0	0	0	2	4	0	0	1	0	0	0	1	6	2450	98	17	16
2020-07-19	0	1	0	0	4	1	0	14	0	0	0	0	1	2450	98	17	21
2020-07-20	0	0	0	0	2	0	0	0	0	0	0	1	11	2451	98	17	15
2020-07-21	0	0	0	1	3	0	0	1	0	0	0	0	9	2453	98	17	16
2020-07-22	0	0	0	0	0	0	0	1	1	0	1	1	4	2454	98	17	9
2020-07-23	0	0	0	1	0	0	0	0	3	0	0	0	0	2454	98	17	4
2020-07-24	0	0	0	0	6	0	0	12	0	0	0	0	17	2458	98	18	40
2020-07-25	0	0	0	0	0	0	0	7	1	0	1	1	1	2460	98	18	13
2020-07-26	0	0	0	0	1	0	0	0	0	0	0	4	0	2462	98	18	7
2020-07-27	0	6	0	0	0	0	0	0	0	0	0	3	25	2466	98	19	39
2020-07-28	1	0	0	0	2	0	0	0	0	0	0	1	2	2472	98	19	12
2020-07-29	0	1	0	0	1	0	0	2	0	0	0	4	0	2473	98	19	9
2020-07-30	0	2	0	0	1	1	0	3	0	0	0	1	1	2476	98	19	12
2020-07-31	0	1	0	2	6	0	0	0	0	0	0	0	0	2476	98	19	9
2020-08-01	0	11	0	0	1	0	0	0	0	0	0	2	0	2476	98	19	14
2020-08-02	0	1	0	0	0	0	0	0	0	0	0	0	0	2476	98	20	2
2020-08-03	1	0	0	0	0	0	0	0	0	0	0	0	0	2476	98	20	1
2020-08-04	0	3	0	0	0	0	0	1	0	0	0	2	0	2491	98	20	21
2020-08-05	0	6	0	0	0	2	0	0	0	0	0	4	0	2493	98	21	15
2020-08-06	10	1	1	2	2	0	0	1	0	0	0	4	1	2496	98	21	25
2020-08-07	0	0	0	0	1	1	0	0	0	0	0	0	1	2499	98	22	7
2020-08-08	0	0	3	0	1	0	0	0	0	0	0	0	1	2506	99	22	13
2020-08-09	0	0	0	3	4	0	1	2	0	0	0	0	0	2507	99	22	11
2020-08-10	0	0	0	0	1	0	0	1	0	0	0	1	0	2513	99	22	9
2020-08-11	0	2	0	0	0	0	0	2	0	0	0	4	0	2517	99	22	12
2020-08-12	0	9	0	0	3	0	0	0	0	0	0	0	0	2520	99	22	15
2020-08-13	0	12	1	0	2	0	0	0	0	0	0	0	1	2523	99	22	19
2020-08-14	1	14	2	0	0	2	0	1	0	0	0	0	0	2529	99	22	26
2020-08-15	0	5	1	0	5	0	0	0	0	0	0	1	0	2542	99	22	25
2020-08-16	0	6	3	0	1	0	0	0	0	0	0	0	0	2547	99	22	15
2020-08-17	0	3	0	0	0	0	0	0	0	0	0	0	0	2548	99	22	4
2020-08-18	0	7	4	0	0	0	0	1	0	0	0	0	0	2551	99	23	16
2020-08-19	0	0	0	0	1	0	0	0	0	0	0	0	4	2551	99	23	5
2020-08-20	0	1	0	0	2	0	0	0	0	0	0	0	1	2554	99	23	7
2020-08-21	0	7	0	0	0	0	0	0	0	0	0	1	1	2555	99	23	10
2020-08-22	0	2	0	0	0	0	0	0	0	0	0	0	3	2558	99	23	8
2020-08-23	0	0	0	0	0	0	0	0	0	0	0	0	5	2560	99	23	7
2020-08-24	1	7	0	0	5	0	0	0	0	0	0	0	0	2560	99	23	13
2020-08-25	0	5	0	0	1	0	0	0	0	0	0	0	0	2560	99	23	6
2020-08-26	0	0	0	0	2	0	3	0	0	0	0	0	0	2560	99	23	5
2020-08-27	0	1	0	0	3	0	0	0	0	0	0	0	1	2565	99	23	10
2020-08-28	0	0	0	0	2	0	0	0	0	0	0	0	1	2573	99	23	11
2020-08-29	0	1	0	0	1	0	0	0	0	0	0	0	1	2587	99	23	17
2020-08-30	0	2	0	0	4	0	0	0	0	0	0	0	0	2587	99	23	6
2020-08-31	0	2	0	0	3	0	0	0	0	0	0	9	0	2587	99	23	14
2020-09-01	0	0	0	0	1	0	0	0	1	0	0	0	0	2591	99	23	6
2020-09-02	0	4	0	0	0	2	0	1	0	0	0	6	0	2592	99	23	14
2020-09-03	0	1	0	0	2	1	0	0	0	0	0	0	0	2599	99	23	11
2020-09-04	0	1	0	0	0	0	0	0	0	0	0	1	0	2603	99	23	6
2020-09-05	0	0	1	0	0	0	0	0	0	0	0	2	0	2606	99	23	6
2020-09-06	0	4	1	0	2	0	0	0	0	0	0	51	0	2610	99	23	62
2020-09-07	1	22	0	0	9	1	0	0	0	0	0	62	0	2615	99	23	100
2020-09-08	0	16	0	0	1	1	0	0	0	0	0	4	1	2616	99	23	24
2020-09-09	0	4	0	0	1	0	0	0	0	0	0	40	0	2616	99	23	45
2020-09-10	0	14	0	0	1	0	0	0	0	0	0	167	0	2616	99	23	182
2020-09-11	0	5	0	0	2	0	0	0	0	0	0	49	0	2618	99	23	58
2020-09-12	0	14	0	0	1	0	0	0	0	0	0	31	0	2619	99	23	47
2020-09-13	0	1	0	0	0	4	0	0	0	0	0	25	0	2620	99	23	31
2020-09-14	0	0	0	0	5	0	0	0	0	0	0	13	0	2625	99	23	23
2020-09-15	0	1	1	0	0	0	0	0	0	0	0	60	0	2625	99	23	62
2020-09-16	0	7	2	0	3	0	0	0	0	0	0	8	1	2625	99	23	21
2020-09-17	0	0	0	0	3	1	0	0	0	0	0	91	0	2625	99	23	95
2020-09-18	0	9	0	0	1	0	0	0	0	0	0	8	0	2627	99	23	20
2020-09-19	0	3	1	0	4	0	0	0	0	0	0	36	0	2633	99	25	52
2020-09-20	0	1	0	0	4	0	0	0	0	0	0	49	0	2636	99	25	57
2020-09-21	0	10	0	0	1	0	0	0	0	0	0	60	2	2645	99	25	82
2020-09-22	0	5	0	0	2	0	0	0	0	0	1	134	0	2650	99	25	147
2020-09-23	0	4	0	0	3	0	0	1	0	0	0	63	0	2650	99	25	71
2020-09-24	0	8	0	0	2	0	0	1	1	0	0	97	0	2652	99	25	111
2020-09-25	0	0	0	0	2	3	1	1	1	2	0	64	1	2658	99	26	82
2020-09-26	0	0	0	0	11	0	1	2	4	0	0	124	2	2664	99	26	150
2020-09-27	0	1	0	0	11	1	1	0	0	1	0	98	0	2665	99	27	115
2020-09-28	1	1	1	1	15	0	1	2	0	0	1	73	3	2666	100	27	101
2020-09-29	2	13	1	1	10	1	0	8	2	3	2	35	4	2672	100	28	89
2020-09-30	2	98	1	0	13	0	1	5	1	2	0	78	0	2686	105	28	220
2020-10-01	0	129	0	3	31	2	0	1	1	3	2	153	0	2687	105	29	327
2020-10-02	0	102	3	0	32	1	0	4	0	9	2	155	3	2691	107	29	317
2020-10-03	0	113	1	2	31	2	0	8	0	0	1	126	1	2694	107	34	293
2020-10-04	0	241	0	2	34	1	1	2	1	5	1	130	1	2701	109	38	432
2020-10-05	0	397	3	8	39	7	0	6	0	1	0	219	3	2707	110	39	691
2020-10-06	0	153	7	4	20	1	0	6	2	4	1	282	3	2711	112	39	489
2020-10-07	0	16	1	5	36	2	1	5	1	5	0	271	8	2723	114	49	375
2020-10-08	0	10	8	1	24	4	0	5	0	5	0	274	10	2733	116	50	354
2020-10-09	0	27	3	2	44	0	1	2	0	0	0	277	9	2739	117	52	374
2020-10-10	0	16	1	1	26	0	3	3	0	3	0	488	0	2754	117	57	561
2020-10-11	0	10	141	4	69	12	1	2	0	0	0	291	1	2782	119	59	563
2020-10-12	0	60	23	16	76	2	0	10	1	0	0	443	0	2792	119	78	660
2020-10-13	0	113	17	3	68	1	2	3	0	0	0	429	3	2804	120	86	660
2020-10-14	0	31	16	52	150	11	2	0	0	0	2	304	4	2814	121	92	589
2020-10-15	0	7	33	9	50	1	3	5	1	0	0	489	0	2824	123	111	629
2020-10-16	0	38	189	4	159	1	1	2	0	3	0	451	4	2839	125	111	869
2020-10-17	0	9	45	10	77	3	1	1	0	2	0	702	5	2846	125	120	871
2020-10-18	0	3	26	18	107	4	16	2	1	1	0	643	0	2853	128	154	865
2020-10-19	0	17	8	9	132	6	0	1	0	0	1	673	1	2860	129	160	862
2020-10-20	0	7	12	7	116	9	3	0	1	0	1	535	0	2886	135	169	732
2020-10-21	0	3	10	14	137	38	3	1	2	1	3	578	1	2909	139	198	847
2020-10-22	0	1	39	4	62	37	0	4	1	2	0	528	2	2920	139	217	710
2020-10-23	0	76	23	10	76	96	3	7	0	0	0	889	8	2939	139	238	1228
2020-10-24	0	1	97	6	88	22	0	15	0	7	1	533	16	2949	140	264	823
2020-10-25	0	3	61	8	177	25	2	4	0	3	0	927	7	2966	140	270	1240
2020-10-26	0	4	13	11	126	155	0	8	0	4	0	410	16	2977	141	346	835
2020-10-27	0	28	19	6	89	24	0	8	0	11	0	546	27	2991	141	375	801
2020-10-28	0	37	13	5	135	43	1	10	1	1	0	352	10	3014	142	392	649
2020-10-29	0	5	35	10	150	23	0	9	0	0	0	466	16	3033	143	457	799
2020-10-30	0	2	2	6	55	25	0	0	1	2	1	529	9	3044	147	469	659
2020-10-31	0	1	23	5	225	8	1	1	0	15	0	644	11	3048	148	487	957
2020-11-01	0	3	21	3	129	16	0	9	1	0	2	503	14	3070	154	592	834
2020-11-02	0	12	35	3	125	71	1	1	0	1	0	678	21	3092	157	673	1054
2020-11-03	0	25	23	6	231	44	0	2	0	3	2	646	9	3101	161	701	1032
2020-11-04	0	7	36	6	180	90	5	2	0	0	0	564	6	3118	162	796	1009
2020-11-05	0	19	192	18	164	45	2	4	0	8	0	1199	18	3136	171	855	1755
2020-11-06	0	15	18	37	247	68	2	5	0	3	0	616	25	3164	171	959	1168
2020-11-07	0	3	18	7	148	104	5	1	0	1	2	524	2	3175	173	983	852
2020-11-08	0	8	34	51	138	260	5	10	0	0	2	370	4	3197	178	1046	972
2020-11-09	0	3	27	12	236	141	0	8	0	0	9	397	6	3216	181	1054	869
2020-11-10	2	17	26	14	178	225	6	10	0	0	1	259	14	3237	184	1100	822
2020-11-11	0	3	63	9	174	240	8	8	0	0	2	319	8	3286	185	1135	919
2020-11-12	0	5	42	13	364	83	13	3	0	0	5	556	13	3488	186	1139	1304
2020-11-13	0	10	34	53	200	371	6	15	0	0	5	391	4	3501	190	1147	1114
2020-11-14	1	8	42	21	185	48	2	9	0	0	1	381	4	3976	191	1177	1208
2020-11-15	0	10	26	116	151	90	1	8	0	4	7	288	1	4368	192	1185	1103
2020-11-16	0	8	33	47	271	67	2	14	0	1	19	499	1	4613	194	1186	1210
2020-11-17	0	11	16	16	141	31	4	3	0	0	3	387	3	4644	195	1199	660
2020-11-18	0	7	8	48	407	32	1	15	0	0	17	660	8	4716	195	1214	1290
2020-11-19	0	19	25	24	153	153	2	9	0	4	7	512	2	4762	196	1215	958
2020-11-20	0	6	17	29	402	121	0	33	0	0	7	346	0	4830	196	1227	1041
2020-11-21	1	16	15	55	603	29	5	9	0	0	8	311	0	4860	197	1240	1096
2020-11-22	1	36	12	81	1203	41	0	15	0	0	9	289	0	5056	198	1240	1884
2020-11-23	0	14	15	112	1623	73	2	19	0	0	6	232	1	5146	198	1241	2188
2020-11-24	0	24	14	80	115	318	1	30	2	1	8	293	2	5190	199	1278	970
2020-11-25	0	24	17	79	161	158	0	60	0	1	28	326	4	5249	204	1291	935
2020-11-26	0	25	64	42	175	167	0	33	3	0	5	441	0	5403	204	1291	1109
2020-11-27	0	17	92	167	266	41	1	46	0	0	18	476	0	5594	204	1291	1315
2020-11-28	0	52	46	77	238	32	1	37	1	1	6	290	0	6087	204	1326	1309
2020-11-29	0	31	60	43	402	141	0	54	2	0	1	326	2	6206	205	1356	1212
2020-11-30	0	21	29	13	891	146	0	68	0	0	10	267	1	6232	205	1356	1472
2020-12-01	0	26	60	34	249	62	1	102	1	0	2	229	0	6317	205	1356	851
2020-12-02	0	32	43	26	459	52	2	78	4	1	9	310	1	6366	205	1365	1075
2020-12-03	1	24	48	47	320	15	0	69	15	0	20	320	1	6622	207	1368	1141
2020-12-04	0	30	44	39	221	10	5	66	2	0	35	391	1	6887	211	1378	1123
2020-12-05	0	17	31	108	337	258	3	125	4	1	2	250	0	7065	211	1399	1335
2020-12-06	0	18	55	54	426	541	1	98	1	0	3	248	2	7213	211	1404	1600
2020-12-07	0	10	18	29	417	23	0	108	33	0	2	271	2	7311	212	1404	1012
2020-12-08	0	16	29	33	277	33	2	100	119	0	17	203	0	7440	212	1405	959
2020-12-09	0	14	42	115	1428	67	5	100	45	3	3	274	1	7576	213	1405	2234
2020-12-10	0	22	34	12	829	64	5	69	96	2	2	532	1	7708	215	1413	1810
2020-12-11	0	16	102	62	823	49	15	105	79	6	1	429	1	7946	215	1424	1937
2020-12-12	1	13	26	105	435	29	7	103	28	12	0	333	0	8077	215	1430	1229
2020-12-13	0	5	31	62	532	260	1	45	0	9	2	283	0	8201	216	1446	1371
2020-12-14	0	20	34	110	503	67	5	48	8	7	3	260	0	8897	216	1457	1772
2020-12-15	0	9	69	35	481	60	14	105	13	1	1	268	0	9129	220	1460	1295
2020-12-16	0	9	80	41	368	33	98	67	4	2	10	184	9	9426	222	1476	1220
2020-12-17	0	0	0	0	0	0	0	0	0	0	0	0	0	9426	222	1476	0
2020-12-18	0	4	37	65	692	174	140	77	6	4	1	260	1	9623	228	1495	1683
2020-12-19	0	13	30	82	401	18	3	75	16	0	10	199	2	9904	232	1514	1153
2020-12-20	0	6	30	10	441	169	1	156	12	2	1	196	3	10188	234	1541	1340
2020-12-21	0	3	18	21	1204	58	9	278	12	1	6	247	0	10315	239	1570	2018
2020-12-22	0	5	23	17	1014	57	9	167	6	0	4	252	0	10819	241	1572	2062
2020-12-23	0	14	43	8	535	31	124	118	45	1	4	189	4	11045	245	1574	1348
2020-12-24	0	4	37	26	491	144	76	115	12	7	9	249	2	11424	249	1600	1581
2020-12-25	0	0	25	55	461	89	14	205	11	0	4	225	3	11564	256	1608	1247
2020-12-26	1	16	58	26	710	33	5	412	19	0	54	248	6	12292	259	1624	2335
2020-12-27	0	27	37	30	392	39	23	194	9	5	31	186	3	12494	265	1636	1196
2020-12-28	0	12	69	47	697	160	14	191	11	3	28	157	2	12690	274	1636	1596
2020-12-29	0	8	57	17	747	60	9	110	288	2	31	230	4	13048	276	1636	1923
2020-12-30	0	23	69	48	472	34	8	607	48	2	56	280	1	13267	277	1638	1870
2020-12-31	0	24	92	33	1205	78	239	194	15	17	37	299	2	13489	282	1701	2525
	MIN	0
	Q1	0
	MEDIAN	1
	Q3	7
	MAX	1623

## Sheet: Covid-19 Cumulative Daily Case
date	perlis	kedah	pulau-pinang	perak	selangor	negeri-sembilan	melaka	johor	pahang	terengganu	kelantan	sabah	sarawak	wp-kuala-lumpur	wp-putrajaya	wp-labuan
2020-03-15	8	31	15	18	144	42	14	52	19	4	18	57	21	106	1	4
2020-03-16	8	31	23	23	161	45	17	77	28	7	25	82	29	113	1	4
2020-03-17	8	36	30	28	192	45	18	88	29	10	30	103	49	119	1	5
2020-03-18	9	40	32	35	223	56	20	101	32	11	44	112	51	123	6	5
2020-03-19	9	41	37	45	263	65	22	114	36	20	51	119	58	139	6	5
2020-03-20	9	47	50	55	292	70	22	129	37	27	61	136	68	166	9	5
2020-03-21	9	52	58	66	309	78	23	145	40	32	63	158	76	183	9	5
2020-03-22	9	59	66	81	354	94	25	158	56	38	71	169	78	242	13	5
2020-03-23	9	64	68	98	381	109	31	162	56	38	78	170	83	257	15	5
2020-03-24	10	69	70	128	435	123	33	196	64	38	84	170	85	270	16	5
2020-03-25	10	72	74	151	510	132	33	239	66	39	94	172	95	321	18	5
2020-03-26	10	73	80	159	546	138	33	259	70	41	98	182	110	323	20	5
2020-03-27	10	74	86	165	579	153	42	285	84	45	108	197	118	344	20	10
2020-03-28	10	75	87	176	612	162	43	309	96	47	123	197	129	372	22	10
2020-03-29	11	77	88	184	672	172	50	333	99	47	127	201	135	396	24	10
2020-03-30	12	77	94	189	704	181	52	349	102	47	131	206	156	430	26	10
2020-03-31	12	79	96	194	726	189	63	368	111	48	134	209	188	455	26	10
2020-04-01	12	80	98	200	800	207	70	395	114	50	137	210	211	488	34	10
2020-04-02	12	81	98	205	863	211	73	416	127	68	137	215	239	543	35	10
2020-04-03	12	81	99	207	890	220	75	422	151	74	139	225	246	595	36	11
2020-04-04	13	82	101	213	943	231	89	438	158	84	141	238	261	622	37	11
2020-04-05	13	85	101	219	970	239	99	468	161	90	142	240	273	640	41	12
2020-04-06	17	90	102	233	1020	261	103	478	166	90	147	241	288	671	43	13
2020-04-07	17	91	108	237	1078	270	116	496	169	93	147	248	306	685	45	13
2020-04-08	17	93	108	241	1118	281	119	503	183	98	148	248	312	699	47	13
2020-04-09	17	93	109	242	1148	292	133	523	187	101	149	250	327	713	49	13
2020-04-10	17	93	114	243	1183	309	141	544	214	102	151	260	334	759	51	15
2020-04-11	17	93	116	244	1236	318	144	558	225	102	152	266	342	803	52	15
2020-04-12	17	93	116	247	1249	360	144	579	225	106	154	280	348	830	54	15
2020-04-13	18	93	119	250	1299	362	147	587	236	106	154	285	363	899	54	15
2020-04-14	18	94	119	250	1316	363	147	601	253	106	154	285	371	926	54	15
2020-04-15	18	94	119	251	1329	389	147	614	261	108	155	288	387	952	55	15
2020-04-16	18	94	119	252	1338	402	148	623	262	108	155	293	397	971	55	16
2020-04-17	18	94	119	252	1340	405	148	639	264	109	155	303	403	985	55	16
2020-04-18	18	94	119	252	1343	405	185	642	269	109	155	306	408	1004	64	16
2020-04-19	18	94	119	252	1345	408	187	644	271	109	155	308	414	1008	77	16
2020-04-20	18	94	119	252	1356	409	188	645	279	109	155	308	436	1021	77	16
2020-04-21	18	95	119	252	1357	411	189	648	285	109	155	308	455	1037	78	16
2020-04-22	18	95	119	252	1369	431	189	651	286	110	155	309	459	1066	78	16
2020-04-23	18	95	119	252	1387	433	192	655	287	110	155	311	468	1115	78	16
2020-04-24	18	95	119	252	1388	433	192	655	288	110	155	311	478	1154	78	16
2020-04-25	18	95	121	252	1394	434	193	659	288	110	155	311	485	1170	79	16
2020-04-26	18	95	121	253	1398	435	193	659	288	110	155	312	488	1200	79	16
2020-04-27	18	95	121	253	1403	436	193	660	288	110	155	313	496	1214	80	16
2020-04-28	18	95	121	253	1404	508	193	660	293	110	155	315	502	1222	80	16
2020-04-29	18	95	121	253	1431	513	198	663	294	110	155	315	507	1232	81	16
2020-04-30	18	95	121	253	1455	513	199	666	297	110	155	315	509	1264	85	16
2020-05-01	18	95	121	253	1518	521	201	667	305	110	155	315	518	1278	85	16
2020-05-02	18	95	121	253	1529	592	204	667	305	110	155	316	523	1308	86	16
2020-05-03	18	95	121	253	1550	598	207	667	305	110	155	316	523	1333	86	16
2020-05-04	18	95	121	253	1555	598	207	667	305	110	155	316	525	1356	86	16
2020-05-05	18	95	121	253	1564	600	208	667	305	110	155	316	536	1378	86	16
2020-05-06	18	95	121	253	1580	600	209	667	305	110	155	317	537	1398	86	16
2020-05-07	18	95	121	253	1586	653	209	667	306	110	155	317	538	1404	87	16
2020-05-08	18	95	121	253	1596	681	210	667	306	110	155	317	542	1414	88	16
2020-05-09	18	95	121	255	1604	726	210	667	308	110	155	317	543	1423	88	16
2020-05-10	18	95	121	255	1607	742	211	667	312	110	155	327	543	1458	89	16
2020-05-11	18	95	121	255	1610	742	211	667	312	110	155	328	543	1470	89	16
2020-05-12	18	95	121	255	1612	764	213	667	315	110	155	328	544	1475	89	16
2020-05-13	18	95	121	255	1613	775	214	668	323	110	155	328	544	1493	89	16
2020-05-14	18	95	121	255	1627	776	215	668	328	110	155	328	544	1508	89	16
2020-05-15	18	95	121	255	1628	776	215	668	335	110	155	331	544	1515	90	16
2020-05-16	18	95	121	255	1636	776	215	668	336	110	155	331	544	1528	90	16
2020-05-17	18	95	121	255	1644	776	215	668	336	110	155	331	544	1566	91	16
2020-05-18	18	95	121	255	1650	776	215	669	338	110	155	337	544	1588	90	16
2020-05-19	18	96	121	255	1665	776	215	669	338	111	156	338	544	1598	93	16
2020-05-20	18	96	121	255	1673	778	215	669	339	111	156	338	544	1637	93	16
2020-05-21	18	96	121	255	1693	791	216	669	341	111	156	340	545	1676	93	16
2020-05-22	18	96	121	255	1730	792	216	670	344	111	156	341	545	1681	93	16
2020-05-23	18	96	121	255	1776	792	216	671	344	111	156	343	545	1692	93	16
2020-05-24	18	96	121	255	1829	792	216	671	344	111	156	343	549	1807	93	16
2020-05-25	18	96	121	255	1838	793	216	671	344	111	156	343	549	1984	93	16
2020-05-26	18	96	121	255	1843	793	216	671	344	111	156	344	552	1990	93	16
2020-05-27	18	96	121	255	1845	793	216	671	345	111	156	344	552	1997	93	16
2020-05-28	18	96	121	255	1873	852	216	674	346	111	156	346	552	2007	93	16
2020-05-29	18	96	121	256	1878	856	218	675	346	111	156	346	552	2020	97	16
2020-05-30	18	96	121	256	1909	858	219	675	361	111	156	346	552	2028	97	16
2020-05-31	18	96	121	256	1920	860	232	675	361	111	156	347	552	2039	97	16
2020-06-01	18	96	121	256	1926	866	233	676	361	111	156	348	552	2044	97	16
2020-06-02	18	96	121	256	1928	902	233	676	361	111	156	348	552	2099	97	16
2020-06-03	18	96	121	256	1930	905	233	676	362	111	156	348	552	2370	97	16
2020-06-04	18	96	121	256	1939	905	234	676	363	111	156	351	553	2374	97	16
2020-06-05	18	96	121	256	1953	910	234	676	363	111	156	351	555	2389	97	17
2020-06-06	18	96	121	256	1965	911	234	676	363	111	156	353	555	2393	97	17
2020-06-07	18	96	121	256	1968	911	235	676	363	111	156	355	555	2394	97	17
2020-06-08	18	96	121	256	1971	911	235	676	363	111	156	355	555	2398	97	17
2020-06-09	18	96	121	256	1971	911	235	677	363	111	156	355	556	2398	97	17
2020-06-10	18	96	121	256	1974	927	246	677	363	111	156	355	556	2399	97	17
2020-06-11	18	96	121	256	1987	931	250	678	363	111	156	356	556	2409	97	17
2020-06-12	18	96	121	257	1994	957	252	680	365	111	156	358	556	2410	97	17
2020-06-13	18	96	121	257	1996	957	253	680	365	111	156	358	557	2414	97	17
2020-06-14	18	96	121	257	1998	989	255	683	365	111	156	359	557	2415	97	17
2020-06-15	18	96	121	257	1999	993	255	684	365	111	156	359	560	2417	97	17
2020-06-16	18	96	121	257	2004	994	255	684	365	111	156	361	561	2418	97	17
2020-06-17	18	96	121	258	2006	994	255	686	365	111	156	362	565	2422	97	17
2020-06-18	18	96	121	258	2009	995	255	686	365	111	156	362	566	2423	97	17
2020-06-19	18	96	121	258	2021	996	255	686	365	111	156	363	566	2430	97	17
2020-06-20	18	96	121	258	2025	1002	256	687	365	111	156	364	569	2430	97	17
2020-06-21	18	96	121	258	2027	1014	256	688	365	111	156	364	569	2430	97	17
2020-06-22	18	96	121	258	2027	1015	256	688	365	111	156	366	569	2430	97	17
2020-06-23	18	96	121	258	2032	1015	256	688	365	111	156	366	570	2430	97	17
2020-06-24	18	96	121	258	2034	1015	256	689	365	111	157	366	570	2430	97	17
2020-06-25	18	97	121	258	2036	1015	256	691	365	111	157	366	570	2431	97	17
2020-06-26	18	97	121	258	2039	1016	256	691	365	111	157	368	570	2435	97	17
2020-06-27	18	97	121	258	2044	1016	256	691	365	111	157	370	571	2436	97	17
2020-06-28	18	97	121	258	2046	1016	256	691	365	111	157	371	571	2436	97	17
2020-06-29	18	97	121	258	2047	1016	256	691	365	111	157	372	571	2436	97	17
2020-06-30	18	97	121	258	2048	1016	256	691	365	111	157	372	571	2436	97	17
2020-07-01	18	97	121	258	2048	1016	256	692	365	111	157	373	571	2437	97	17
2020-07-02	18	97	121	258	2051	1016	256	692	365	111	157	375	571	2437	97	17
2020-07-03	18	97	121	258	2058	1026	256	692	365	111	157	376	571	2438	97	17
2020-07-04	18	97	121	258	2060	1027	256	692	365	111	157	378	571	2438	97	17
2020-07-05	18	97	121	258	2062	1027	256	693	365	111	157	378	572	2439	97	17
2020-07-06	18	97	121	258	2065	1027	256	694	365	111	157	378	572	2441	97	17
2020-07-07	18	97	121	258	2066	1027	256	694	365	111	157	378	573	2442	97	17
2020-07-08	18	98	121	258	2070	1027	256	696	365	111	157	378	575	2445	97	17
2020-07-09	18	98	121	258	2076	1027	256	697	365	111	157	379	575	2445	97	17
2020-07-10	18	98	121	258	2079	1027	257	699	365	111	157	379	577	2445	98	17
2020-07-11	18	98	121	258	2088	1027	257	699	365	111	157	380	579	2445	98	17
2020-07-12	18	99	121	258	2092	1027	258	699	365	111	157	380	580	2445	98	17
2020-07-13	18	99	121	258	2093	1027	258	701	365	111	157	380	580	2446	98	17
2020-07-14	18	99	121	258	2094	1027	258	701	365	111	157	380	583	2447	98	17
2020-07-15	18	99	121	258	2094	1027	258	701	365	112	157	380	584	2448	98	17
2020-07-16	18	99	121	258	2098	1027	258	701	365	114	157	381	594	2448	98	17
2020-07-17	18	99	121	258	2099	1027	258	701	365	114	158	381	601	2448	98	17
2020-07-18	18	99	121	260	2103	1027	258	702	365	114	158	382	607	2450	98	17
2020-07-19	18	100	121	260	2107	1028	258	716	365	114	158	382	608	2450	98	17
2020-07-20	18	100	121	260	2109	1028	258	716	365	114	158	383	619	2451	98	17
2020-07-21	18	100	121	261	2112	1028	258	717	365	114	158	383	628	2453	98	17
2020-07-22	18	100	121	261	2112	1028	258	718	366	114	159	384	632	2454	98	17
2020-07-23	18	100	121	262	2112	1028	258	718	369	114	159	384	632	2454	98	17
2020-07-24	18	100	121	262	2118	1028	258	730	369	114	159	384	649	2458	98	18
2020-07-25	18	100	121	262	2118	1028	258	737	370	114	160	385	650	2460	98	18
2020-07-26	18	100	121	262	2119	1028	258	737	370	114	160	389	650	2462	98	18
2020-07-27	18	106	121	262	2119	1028	258	737	370	114	160	392	675	2466	98	19
2020-07-28	19	106	121	262	2121	1028	258	737	370	114	160	393	677	2472	98	19
2020-07-29	19	107	121	262	2122	1028	258	739	370	114	160	397	677	2473	98	19
2020-07-30	19	109	121	262	2123	1029	258	742	370	114	160	398	678	2476	98	19
2020-07-31	19	110	121	264	2129	1029	258	742	370	114	160	398	678	2476	98	19
2020-08-01	19	121	121	264	2130	1029	258	742	370	114	160	400	678	2476	98	19
2020-08-02	19	122	121	264	2130	1029	258	742	370	114	160	400	678	2476	98	20
2020-08-03	20	122	121	264	2130	1029	258	742	370	114	160	400	678	2476	98	20
2020-08-04	20	125	121	264	2130	1029	258	743	370	114	160	402	678	2491	98	20
2020-08-05	20	131	121	264	2130	1031	258	743	370	114	160	406	678	2493	98	21
2020-08-06	30	132	122	266	2132	1031	258	744	370	114	160	410	679	2496	98	21
2020-08-07	30	132	122	266	2133	1032	258	744	370	114	160	410	680	2499	98	22
2020-08-08	30	132	125	266	2134	1032	258	744	370	114	160	410	681	2506	99	22
2020-08-09	30	132	125	269	2138	1032	259	746	370	114	160	410	681	2507	99	22
2020-08-10	30	132	125	269	2139	1032	259	747	370	114	160	411	681	2513	99	22
2020-08-11	30	134	125	269	2139	1032	259	749	370	114	160	415	681	2517	99	22
2020-08-12	30	143	125	269	2142	1032	259	749	370	114	160	415	681	2520	99	22
2020-08-13	30	155	126	269	2144	1032	259	749	370	114	160	415	682	2523	99	22
2020-08-14	31	169	128	269	2144	1034	259	750	370	114	160	415	682	2529	99	22
2020-08-15	31	174	129	269	2149	1034	259	750	370	114	160	416	682	2542	99	22
2020-08-16	31	180	132	269	2150	1034	259	750	370	114	160	416	682	2547	99	22
2020-08-17	31	183	132	269	2150	1034	259	750	370	114	160	416	682	2548	99	22
2020-08-18	31	190	136	269	2150	1034	259	751	370	114	160	416	682	2551	99	23
2020-08-19	31	190	136	269	2151	1034	259	751	370	114	160	416	686	2551	99	23
2020-08-20	31	191	136	269	2153	1034	259	751	370	114	160	416	687	2554	99	23
2020-08-21	31	198	136	269	2153	1034	259	751	370	114	160	417	688	2555	99	23
2020-08-22	31	200	136	269	2153	1034	259	751	370	114	160	417	691	2558	99	23
2020-08-23	31	200	136	269	2153	1034	259	751	370	114	160	417	696	2560	99	23
2020-08-24	32	207	136	269	2158	1034	259	751	370	114	160	417	696	2560	99	23
2020-08-25	32	212	136	269	2159	1034	259	751	370	114	160	417	696	2560	99	23
2020-08-26	32	212	136	269	2161	1034	262	751	370	114	160	417	696	2560	99	23
2020-08-27	32	213	136	269	2164	1034	262	751	370	114	160	417	697	2565	99	23
2020-08-28	32	213	136	269	2166	1034	262	751	370	114	160	417	698	2573	99	23
2020-08-29	32	214	136	269	2167	1034	262	751	370	114	160	417	699	2587	99	23
2020-08-30	32	216	136	269	2171	1034	262	751	370	114	160	417	699	2587	99	23
2020-08-31	32	218	136	269	2174	1034	262	751	370	114	160	426	699	2587	99	23
2020-09-01	32	218	136	269	2175	1034	262	751	371	114	160	426	699	2591	99	23
2020-09-02	32	222	136	269	2175	1036	262	752	371	114	160	432	699	2592	99	23
2020-09-03	32	223	136	269	2177	1037	262	752	371	114	160	432	699	2599	99	23
2020-09-04	32	224	136	269	2177	1037	262	752	371	114	160	433	699	2603	99	23
2020-09-05	32	224	137	269	2177	1037	262	752	371	114	160	435	699	2606	99	23
2020-09-06	32	228	138	269	2179	1037	262	752	371	114	160	486	699	2610	99	23
2020-09-07	33	250	138	269	2188	1038	262	752	371	114	160	548	699	2615	99	23
2020-09-08	33	266	138	269	2189	1039	262	752	371	114	160	552	700	2616	99	23
2020-09-09	33	270	138	269	2190	1039	262	752	371	114	160	592	700	2616	99	23
2020-09-10	33	284	138	269	2191	1039	262	752	371	114	160	759	700	2616	99	23
2020-09-11	33	289	138	269	2193	1039	262	752	371	114	160	808	700	2618	99	23
2020-09-12	33	303	138	269	2194	1039	262	752	371	114	160	839	700	2619	99	23
2020-09-13	33	304	138	269	2194	1043	262	752	371	114	160	864	700	2620	99	23
2020-09-14	33	304	138	269	2199	1043	262	752	371	114	160	877	700	2625	99	23
2020-09-15	33	305	139	269	2199	1043	262	752	371	114	160	937	700	2625	99	23
2020-09-16	33	312	141	269	2202	1043	262	752	371	114	160	945	701	2625	99	23
2020-09-17	33	312	141	269	2205	1044	262	752	371	114	160	1036	701	2625	99	23
2020-09-18	33	321	141	269	2206	1044	262	752	371	114	160	1044	701	2627	99	23
2020-09-19	33	324	142	269	2210	1044	262	752	371	114	160	1080	701	2633	99	25
2020-09-20	33	325	142	269	2214	1044	262	752	371	114	160	1129	701	2636	99	25
2020-09-21	33	335	142	269	2215	1044	262	752	371	114	160	1189	703	2645	99	25
2020-09-22	33	340	142	269	2217	1044	262	752	371	114	161	1323	703	2650	99	25
2020-09-23	33	344	142	269	2220	1044	262	753	371	114	161	1386	703	2650	99	25
2020-09-24	33	352	142	269	2222	1044	262	754	372	114	161	1483	703	2652	99	25
2020-09-25	33	352	142	269	2224	1047	263	755	373	116	161	1547	704	2658	99	26
2020-09-26	33	352	142	269	2235	1047	264	757	377	116	161	1671	706	2664	99	26
2020-09-27	33	353	142	269	2246	1048	265	757	377	117	161	1769	706	2665	99	27
2020-09-28	34	354	143	270	2261	1048	266	759	377	117	162	1842	709	2666	100	27
2020-09-29	36	367	144	271	2271	1049	266	767	379	120	164	1877	713	2672	100	28
2020-09-30	38	465	145	271	2284	1049	267	772	380	122	164	1955	713	2686	105	28
2020-10-01	38	594	145	274	2315	1051	267	773	381	125	166	2108	713	2687	105	29
2020-10-02	38	696	148	274	2347	1052	267	777	381	134	168	2263	716	2691	107	29
2020-10-03	38	809	149	276	2378	1054	267	785	381	134	169	2389	717	2694	107	34
2020-10-04	38	1050	149	278	2412	1055	268	787	382	139	170	2519	718	2701	109	38
2020-10-05	38	1447	152	286	2451	1062	268	793	382	140	170	2738	721	2707	110	39
2020-10-06	38	1600	159	290	2471	1063	268	799	384	144	171	3020	724	2711	112	39
2020-10-07	38	1616	160	295	2507	1065	269	804	385	149	171	3291	732	2723	114	49
2020-10-08	38	1626	168	296	2531	1069	269	809	385	154	171	3565	742	2733	116	50
2020-10-09	38	1653	171	298	2575	1069	270	811	385	154	171	3842	751	2739	117	52
2020-10-10	38	1669	172	299	2601	1069	273	814	385	157	171	4330	751	2754	117	57
2020-10-11	38	1679	313	303	2670	1081	274	816	385	157	171	4621	752	2782	119	59
2020-10-12	38	1739	336	319	2746	1083	274	826	386	157	171	5064	752	2792	119	78
2020-10-13	38	1852	353	322	2814	1084	276	829	386	157	171	5493	755	2804	120	86
2020-10-14	38	1883	369	374	2964	1095	278	829	386	157	173	5797	759	2814	121	92
2020-10-15	38	1890	402	383	3014	1096	281	834	387	157	173	6286	759	2824	123	111
2020-10-16	38	1928	591	387	3173	1097	282	836	387	160	173	6737	763	2839	125	111
2020-10-17	38	1937	636	397	3250	1100	283	837	387	162	173	7439	768	2846	125	120
2020-10-18	38	1940	662	415	3357	1104	299	839	388	163	173	8082	768	2853	128	154
2020-10-19	38	1957	670	424	3489	1110	299	840	388	163	174	8755	769	2860	129	160
2020-10-20	38	1964	682	431	3605	1119	302	840	389	163	175	9290	769	2886	135	169
2020-10-21	38	1967	692	445	3742	1157	305	841	391	164	178	9868	770	2909	139	198
2020-10-22	38	1968	731	449	3804	1194	305	845	392	166	178	10396	772	2920	139	217
2020-10-23	38	2044	754	459	3880	1290	308	852	392	166	178	11285	780	2939	139	238
2020-10-24	38	2045	851	465	3968	1312	308	867	392	173	179	11818	796	2949	140	264
2020-10-25	38	2048	912	473	4145	1337	310	871	392	176	179	12745	803	2966	140	270
2020-10-26	38	2052	925	484	4271	1492	310	879	392	180	179	13155	819	2977	141	346
2020-10-27	38	2080	944	490	4360	1516	310	887	392	191	179	13701	846	2991	141	375
2020-10-28	38	2117	957	495	4495	1559	311	897	393	192	179	14053	856	3014	142	392
2020-10-29	38	2122	992	505	4645	1582	311	906	393	192	179	14519	872	3033	143	457
2020-10-30	38	2124	994	511	4700	1607	311	906	394	194	180	15048	881	3044	147	469
2020-10-31	38	2125	1017	516	4925	1615	312	907	394	209	180	15692	892	3048	148	487
2020-11-01	38	2128	1038	519	5054	1631	312	916	395	209	182	16195	906	3070	154	592
2020-11-02	38	2140	1073	522	5179	1702	313	917	395	210	182	16873	927	3092	157	673
2020-11-03	38	2165	1096	528	5410	1746	313	919	395	213	184	17519	936	3101	161	701
2020-11-04	38	2172	1132	534	5590	1836	318	921	395	213	184	18083	942	3118	162	796
2020-11-05	38	2191	1324	552	5754	1881	320	925	395	221	184	19282	960	3136	171	855
2020-11-06	38	2206	1342	589	6001	1949	322	930	395	224	184	19898	985	3164	171	959
2020-11-07	38	2209	1360	596	6149	2053	327	931	395	225	186	20422	987	3175	173	983
2020-11-08	38	2217	1394	647	6287	2313	332	941	395	225	188	20792	991	3197	178	1046
2020-11-09	38	2220	1421	659	6523	2454	332	949	395	225	197	21189	997	3216	181	1054
2020-11-10	40	2237	1447	673	6701	2679	338	959	395	225	198	21448	1011	3237	184	1100
2020-11-11	40	2240	1510	682	6875	2919	346	967	395	225	200	21767	1019	3286	185	1135
2020-11-12	40	2245	1552	695	7239	3002	359	970	395	225	205	22323	1032	3488	186	1139
2020-11-13	40	2255	1586	748	7439	3373	365	985	395	225	210	22714	1036	3501	190	1147
2020-11-14	41	2263	1628	769	7624	3421	367	994	395	225	211	23095	1040	3976	191	1177
2020-11-15	41	2273	1654	885	7775	3511	368	1002	395	229	218	23383	1041	4368	192	1185
2020-11-16	41	2281	1687	932	8046	3578	370	1016	395	230	237	23882	1042	4613	194	1186
2020-11-17	41	2292	1703	948	8187	3609	374	1019	395	230	240	24269	1045	4644	195	1199
2020-11-18	41	2299	1711	996	8594	3641	375	1034	395	230	257	24929	1053	4716	195	1214
2020-11-19	41	2318	1736	1020	8747	3794	377	1043	395	234	264	25441	1055	4762	196	1215
2020-11-20	41	2324	1753	1049	9149	3915	377	1076	395	234	271	25787	1055	4830	196	1227
2020-11-21	42	2340	1768	1104	9752	3944	382	1085	395	234	279	26098	1055	4860	197	1240
2020-11-22	43	2376	1780	1185	10955	3985	382	1100	395	234	288	26387	1055	5056	198	1240
2020-11-23	43	2390	1795	1297	12578	4058	384	1119	395	234	294	26619	1056	5146	198	1241
2020-11-24	43	2414	1809	1377	12693	4376	385	1149	397	235	302	26912	1058	5190	199	1278
2020-11-25	43	2438	1826	1456	12854	4534	385	1209	397	236	330	27238	1062	5249	204	1291
2020-11-26	43	2463	1890	1498	13029	4701	385	1242	400	236	335	27679	1062	5403	204	1291
2020-11-27	43	2480	1982	1665	13295	4742	386	1288	400	236	353	28155	1062	5594	204	1291
2020-11-28	43	2532	2028	1742	13533	4774	387	1325	401	237	359	28445	1062	6087	204	1326
2020-11-29	43	2563	2088	1785	13935	4915	387	1379	403	237	360	28771	1064	6206	205	1356
2020-11-30	43	2584	2117	1798	14826	5061	387	1447	403	237	370	29038	1065	6232	205	1356
2020-12-01	43	2610	2177	1832	15075	5123	388	1549	404	237	372	29267	1065	6317	205	1356
2020-12-02	43	2642	2220	1858	15534	5175	390	1627	408	238	381	29577	1066	6366	205	1365
2020-12-03	44	2666	2268	1905	15854	5190	390	1696	423	238	401	29897	1067	6622	207	1368
2020-12-04	44	2696	2312	1944	16075	5200	395	1762	425	238	436	30288	1068	6887	211	1378
2020-12-05	44	2713	2343	2052	16412	5458	398	1887	429	239	438	30538	1068	7065	211	1399
2020-12-06	44	2731	2398	2106	16838	5999	399	1985	430	239	441	30786	1070	7213	211	1404
2020-12-07	44	2741	2416	2135	17255	6022	399	2093	463	239	443	31057	1072	7311	212	1404
2020-12-08	44	2757	2445	2168	17532	6055	401	2193	582	239	460	31260	1072	7440	212	1405
2020-12-09	44	2771	2487	2283	18960	6122	406	2293	627	242	463	31534	1073	7576	213	1405
2020-12-10	44	2793	2521	2295	19789	6186	411	2362	723	244	465	32066	1074	7708	215	1413
2020-12-11	44	2809	2623	2357	20612	6235	426	2467	802	250	466	32495	1075	7946	215	1424
2020-12-12	45	2822	2649	2462	21047	6264	433	2570	830	262	466	32828	1075	8077	215	1430
2020-12-13	45	2827	2680	2524	21579	6524	434	2615	830	271	468	33111	1075	8201	216	1446
2020-12-14	45	2847	2714	2634	22082	6591	439	2663	838	278	471	33371	1075	8897	216	1457
2020-12-15	45	2856	2783	2669	22563	6651	453	2768	851	279	472	33639	1075	9129	220	1460
2020-12-16	45	2865	2863	2710	22931	6684	551	2835	855	281	482	33823	1084	9426	222	1476
2020-12-17	45	2865	2863	2710	22931	6684	551	2835	855	281	482	33823	1084	9426	222	1476
2020-12-18	45	2869	2900	2775	23623	6858	691	2912	861	285	483	34083	1085	9623	228	1495
2020-12-19	45	2882	2930	2857	24024	6876	694	2987	877	285	493	34282	1087	9904	232	1514
2020-12-20	45	2888	2960	2867	24465	7045	695	3143	889	287	494	34478	1090	10188	234	1541
2020-12-21	45	2891	2978	2888	25669	7103	704	3421	901	288	500	34725	1090	10315	239	1570
2020-12-22	45	2896	3001	2905	26683	7160	713	3588	907	288	504	34977	1090	10819	241	1572
2020-12-23	45	2910	3044	2913	27218	7191	837	3706	952	289	508	35166	1094	11045	245	1574
2020-12-24	45	2914	3081	2939	27709	7335	913	3821	964	296	517	35415	1096	11424	249	1600
2020-12-25	45	2914	3106	2994	28170	7424	927	4026	975	296	521	35640	1099	11564	256	1608
2020-12-26	46	2930	3164	3020	28880	7457	932	4438	994	296	575	35888	1105	12292	259	1624
2020-12-27	46	2957	3201	3050	29272	7496	955	4632	1003	301	606	36074	1108	12494	265	1636
2020-12-28	46	2969	3270	3097	29969	7656	969	4823	1014	304	634	36231	1110	12690	274	1636
2020-12-29	46	2977	3327	3114	30716	7716	978	4933	1302	306	665	36461	1114	13048	276	1636
2020-12-30	46	3000	3396	3162	31188	7750	986	5540	1350	308	721	36741	1115	13267	277	1638
2020-12-31	46	3024	3488	3195	32393	7828	1225	5734	1365	325	758	37040	1117	13489	282	1701
2021-01-01	46	3044	3714	3246	33169	7879	1248	5846	1381	339	811	37294	1125	13946	286	1704
2021-01-02	46	3091	4002	3258	33807	8010	1343	6426	1410	355	837	37553	1130	14102	298	1705
2021-01-03	46	3144	4105	3333	34480	8082	1349	6605	1431	359	884	37869	1140	14214	315	1721
2021-01-04	47	3189	4160	3367	35167	8138	1383	6900	1443	363	934	38172	1148	14364	321	1722
2021-01-05	47	3236	4220	3392	35676	8236	1404	7328	1468	376	976	38555	1161	14677	334	1759
2021-01-06	47	3278	4297	3426	36641	8361	1417	7899	1479	395	1019	38960	1166	14942	343	1768
2021-01-07	47	3308	4408	3485	37347	8424	1428	9002	1504	405	1085	39453	1180	15641	360	1771
2021-01-08	50	3415	4483	3565	38433	8512	1498	9300	1532	439	1134	39854	1196	15540	380	1777
2021-01-09	58	3480	4756	3607	38997	8863	1548	9602	1568	455	1195	40263	1251	15738	397	1781
2021-01-10	63	3551	4945	3687	39727	9007	1583	9923	1609	484	1298	40666	1275	15969	407	1798
2021-01-11	66	3591	5057	3738	40284	9109	1620	10319	1655	525	1393	41040	1428	16173	420	1806
2021-01-12	66	3653	5374	3979	41291	9194	1641	10761	1751	545	1479	41449	1574	16499	456	1821
2021-01-13	67	3750	5479	4040	42128	9300	1713	11296	1894	572	1564	41899	1740	16788	467	1821
2021-01-14	71	3836	5713	4132	43164	9469	1798	11756	2007	661	1649	42288	1920	17045	491	1855
2021-01-15	71	3978	5907	4206	44053	9539	1856	12291	2077	753	1728	42802	1980	17446	515	1864
2021-01-16	85	4173	6027	4260	45519	9753	1900	13010	2142	833	1869	43251	2049	17793	550	1881
2021-01-17	98	4269	6147	4367	46833	9989	1960	13372	2203	855	1983	43644	2111	18127	573	1903
2021-01-18	114	4411	6292	4481	48046	10115	2116	13701	2287	875	2133	44076	2211	18377	588	1917
2021-01-19	117	4525	6416	4616	49245	10254	2238	14069	2318	908	2266	44602	2367	18898	614	1918
2021-01-20	120	4667	6540	4786	50636	10430	2370	14539	2370	989	2387	45008	2570	19411	637	1919
2021-01-21	128	4823	6711	5031	51181	10532	2476	14962	2418	1046	2522	45409	2702	19987	670	1951
2021-01-22	141	4989	6913	5169	51963	10729	2558	15428	2479	1224	2683	45862	2931	20422	709	1980
2021-01-23	148	5094	7075	5377	53384	10837	2836	15853	2554	1355	2761	46360	3124	20970	744	1983
2021-01-24	151	5179	7165	5423	54334	10997	2988	16231	2617	1534	2838	46791	3379	21360	782	2032
2021-01-25	154	5253	7275	5526	55369	11092	3078	16760	2663	1613	2927	47139	3499	21665	804	2032
2021-01-26	156	5341	7379	5584	56664	11221	3170	17276	2678	1689	3003	47442	3704	22275	819	2033
2021-01-27	159	5417	7480	5765	57486	11333	3233	18345	2720	1757	3063	47737	3774	22973	838	2034
2021-01-28	168	5509	7579	5859	59063	11381	3306	19062	2792	1837	3100	48019	3945	23651	848	2089
2021-01-29	171	5634	7678	5932	62189	11450	3380	19746	2859	1974	3193	48307	4124	24338	864	2094
2021-01-30	171	5733	7779	6044	65474	11608	3422	20538	2910	2059	3221	48570	4315	24818	876	2123
2021-01-31	176	5786	7848	6107	67934	11650	3575	21558	2984	2142	3251	48868	4450	25601	882	2147
2021-02-01	176	5833	7967	6300	69296	11741	3660	22626	3038	2180	3308	49144	4555	26303	892	2154
2021-02-02	177	5892	8052	6384	70441	11820	3722	23334	3101	2295	3339	49420	4676	26922	898	2155
2021-02-03	177	6016	8174	6490	72013	11953	3775	24298	3167	2350	3404	49610	4824	27573	912	2176
2021-02-04	177	6067	8331	6653	74069	12053	4013	24962	3245	2419	3452	49785	5094	28054	932	2177
2021-02-05	178	6158	8480	6745	75297	12169	4154	25560	3296	2503	3510	49981	5272	28449	938	2184
2021-02-06	182	6222	8691	6781	76778	12302	4483	26145	3344	2559	3572	50214	5457	28851	946	2194
2021-02-07	184	6265	8941	6852	78384	12394	4796	26644	3378	2588	3604	50374	5676	29223	955	2194
2021-02-08	188	6302	9150	6924	79580	12498	5140	27134	3406	2618	3634	50543	5760	29518	963	2194
2021-02-09	188	6361	9269	6964	80442	12597	5343	27655	3438	2652	3696	50723	5871	29940	973	2204
2021-02-10	188	6409	9328	7006	82199	12754	5435	28024	3452	2676	3740	50855	6006	30348	977	2207
2021-02-11	192	6637	9472	7088	83281	12843	5536	28801	3473	2702	3788	50997	6190	30783	984	2221
2021-02-12	192	6825	9621	7187	84495	12961	5581	29543	3503	2774	3867	51115	6273	31157	990	2222
2021-02-13	194	6936	9759	7308	85840	13019	5631	30345	3516	2820	3911	51216	6425	31668	993	2224
2021-02-14	194	7028	9815	7393	86943	13059	5642	30837	3526	2871	3999	51332	6586	31822	997	2225
2021-02-15	194	7061	9906	7476	87853	13204	5656	31106	3541	2924	4030	51429	6832	32004	1004	2225
2021-02-16	194	7099	9978	7545	89153	13268	5670	31557	3560	2950	4047	51561	7025	32322	1010	2226
2021-02-17	194	7135	10070	7644	90535	13501	5690	31993	3574	3041	4119	51655	7225	32548	1012	2227
2021-02-18	200	7317	10186	7842	91548	13582	5728	32419	3626	3060	4162	51769	7425	32760	1019	2232
2021-02-19	200	7353	10374	7997	92526	13773	5754	33149	3652	3097	4200	51870	7624	32987	1022	2233
2021-02-20	203	7454	10461	8105	93527	13862	5786	33382	3694	3119	4457	51979	7758	33217	1035	2233
2021-02-21	203	7469	10588	9320	94395	13984	5851	33813	3703	3131	4487	52064	7943	33340	1042	2236
2021-02-22	207	7495	10723	9468	95305	14048	5865	34024	3710	3135	4515	52174	8164	33643	1049	2236
2021-02-23	207	7510	10878	9776	96237	14148	5887	34452	3721	3144	4611	52268	8297	33798	1053	2242
2021-02-24	207	7527	10973	9964	96818	15540	5913	34770	3729	3166	4664	52373	8650	34179	1054	2247
2021-02-25	208	7556	11135	10084	97484	15602	5935	35027	3748	3172	4708	52466	8869	34397	1056	2251
2021-02-26	212	7581	11228	10629	98117	15670	5948	35303	3769	3173	4781	52595	9119	34519	1056	2251
2021-02-27	212	7598	11383	10934	98979	15744	5965	35617	3777	3184	4849	52752	9374	34636	1060	2251
2021-02-28	212	7611	11488	11221	99893	15809	5975	35957	3788	3196	4882	52886	9545	34973	1063	2253
2021-03-01	213	7627	11573	11365	100346	15976	5983	36447	3796	3211	4918	52990	9765	35048	1069	2253
2021-03-02	213	7638	11679	11428	101018	16091	5994	36610	3799	3218	4964	53043	9924	35193	1070	2253
2021-03-03	213	7678	11769	11564	101658	16115	6030	36986	3835	3223	4997	53138	10063	35285	1073	2253
2021-03-04	214	7690	12106	11665	102288	16206	6033	37241	3848	3233	5041	53216	10424	35405	1080	2253
2021-03-05	215	7699	12225	11774	103082	16283	6043	37704	3886	3249	5098	53313	10674	35513	1084	2255
2021-03-06	215	7710	12309	11842	103908	16372	6053	37843	3903	3271	5133	53387	10895	35594	1086	2256
2021-03-07	239	7725	12481	11890	104654	16420	6056	38001	3915	3281	5145	53486	11096	35719	1088	2264
2021-03-08	256	7734	12557	11939	105380	16509	6060	38121	3918	3294	5173	53557	11348	35790	1089	2264
2021-03-09	257	7759	12700	11973	105844	16554	6060	38286	3920	3330	5189	53621	11511	35909	1092	2264
2021-03-10	264	7779	12799	12056	106405	16564	6071	38559	3921	3338	5208	53675	11710	36012	1092	2264
2021-03-11	266	7797	12968	12125	107117	16643	6142	38729	3928	3342	5236	53736	11878	36098	1094	2265
2021-03-12	291	7820	13100	12169	107868	16675	6167	38864	3932	3358	5279	53793	12051	36206	1098	2268
2021-03-13	320	7833	13278	12241	108419	16681	6169	38965	3940	3372	5319	53864	12273	36364	1102	2269
2021-03-14	320	7866	13432	12342	108996	16702	6173	39086	3945	3409	5345	53903	12451	36419	1104	2270
2021-03-15	320	7893	13574	12379	109375	16782	6175	39204	3962	3448	5370	53932	12702	36480	1105	2270
2021-03-16	320	7925	13749	12403	109698	16799	6176	39295	3964	3471	5437	53970	12885	36566	1105	2271
2021-03-17	321	7951	13818	12439	110197	16845	6196	39464	3967	3486	5456	54001	13110	36620	1110	2272
2021-03-18	321	7989	13922	12478	110550	16868	6204	39606	3981	3501	5476	54074	13413	36699	1110	2274
2021-03-19	321	8014	14104	12578	110898	16909	6258	39743	3994	3507	5528	54107	13820	36874	1111	2276
2021-03-20	321	8060	14432	12615	111550	16934	6276	39873	3997	3539	5591	54209	13974	36952	1111	2279
2021-03-21	326	8090	14637	12670	111906	16956	6286	40014	4008	3557	5621	54259	14250	37067	1114	2279
2021-03-22	326	8117	14725	12709	112309	16997	6298	40100	4050	3560	5665	54295	14374	37225	1119	2287
2021-03-23	326	8168	14825	12713	112934	17007	6343	40261	4088	3567	5730	54355	14514	37289	1119	2301
2021-03-24	326	8217	14924	12755	113424	17066	6395	40396	4131	3571	5779	54400	14655	37342	1125	2302
2021-03-25	326	8261	15037	12826	113780	17115	6427	40525	4141	3577	5842	54470	14963	37440	1133	2305
2021-03-26	328	8288	15174	12854	114258	17127	6446	40645	4147	3580	5928	54521	15176	37526	1135	2310
2021-03-27	328	8321	15299	12863	114541	17170	6482	40726	4177	3583	6066	54585	15443	37610	1136	2312
2021-03-28	328	8344	15511	12886	114797	17179	6487	40902	4209	3585	6100	54623	15869	37668	1138	2318
2021-03-29	328	8357	15675	12891	115016	17197	6495	41073	4214	3589	6149	54657	16061	37725	1139	2319
2021-03-30	329	8398	15869	12935	115417	17236	6501	41169	4230	3591	6193	54698	16214	37778	1140	2320
2021-03-31	330	8435	16069	12966	116078	17268	6542	41255	4266	3593	6250	54767	16390	37820	1143	2328
	perlis	kedah	pulau-pinang	perak	selangor	negeri-sembilan	melaka	johor	pahang	terengganu	kelantan	sabah	sarawak	wp-kuala-lumpur	wp-putrajaya	wp-labuan

## Sheet: Population Density Calculation 
State	Total Population	Area ㎢ (Deaprtment of Statistics 2020)	Population Density (people/㎢)
Selangor	6538100	7951	822.299
Sabah	3908500	73904	52.8862
Johor	3781100	19166	197.282
Sarawak	2816500	124450	22.6316
Perak	2510300	20976	119.675
Kedah	2185200	9492	230.215
Kelantan	1906700	15040	126.775
Pulau Pinang	1773600	1049	1690.75
Pahang	1678600	35965	46.6732
Terengganu	1259200	13035	96.6015
Negeri Sembilan	1128800	6658	169.54
Melaka	932700	1712	544.801
Perlis	254900	819	311.233
WP Kuala Lumpur	1773700	243	7299.18
WP Labuan	99600	92	1082.61
WP Putrajaya	110000	49	2244.9
